# Supplementary material
Source: publisher figshare collection journal article supplement (https://gsapubs.figshare.com/articles/dataset/_/20427879)
Supplement: Supplementary file 1 [file 1]

M.N. Muhtar, Chang-Zhi Wu, Matthew J. Brzozowski, M. Santosh, Rong-Song Tian, Guo-Ai Xie, Wan-Feng Zhang, Ru-Xiong Lei, and Wen-Jiao Xiao, 2022, Timing and spatial variation of deformation along the Kanggur-Huangshan shear zone in the Chinese Tianshan: Implications for regional differential uplift and mineralization: GSA Bulletin, <https://doi.org/10.1130/B36221.1>.

## Supplemental Material

**Supplemental Text.** Analytical methods.

**Supplemental Table S1.** Zircon U–Pb age dating results.

**Supplemental Table S2.** Argon step-heating data.

### ANALYTICAL METHODS

#### 1 Crystallographic preferred orientations of quartz

The crystallographic preferred orientations (CPOs) of quartz of deformed rocks were determined using a scanning electron microscope JEOL JSM-6490 equipped with a Nordlys-S electron back-scatter diffraction (EBSD) system at the State Key Laboratory for Mineral Deposits Research, Nanjing University. Thin sections were cut parallel to the structural XY plane (X: parallel to the lineation, Y: parallel to the foliation). The EBSD measurements were conducted with an accelerating voltage of 20 kV, a spot size of 60  $\mu\text{m}$  and a working distance of 18–22 mm. Diffraction patterns were automatically collected and indexed to determine using Channels 5 software from HKL Technology. The detailed description of this method was given in Prior et al. (1999).

#### 2 Zircon U–Pb dating

Zircon grains were separated by heavy liquid and magnetic techniques, hand-picked under a binocular microscope, and mounted in epoxy resin. The internal structure of the zircon grains was characterized via cathodoluminescence (CL) imaging using a HITACHI SUI1510 scanning electron microscope at the State Key Laboratory for Mineral Deposits Research, Nanjing University.

The U and Pb isotope compositions of zircon were determined in situ using an Agilent 7500a laser ablation system coupled with an iCAP RQ ICP–MS at the State Key Laboratory of Mineral Deposits Research, Nanjing University. The laser was operated at an energy density of 6.5/cm<sup>2</sup>, a spot diameter of 32  $\mu\text{m}$ , and a repetition rate of 5 Hz for 70 s of sample ablation. The homogeneous zircon reference standard GEMOC GJ-1 (<sup>207</sup>Pb/<sup>206</sup>Pb age of 608.5  $\pm$  0.4 Ma and <sup>206</sup>Pb/<sup>238</sup>U age of 599.8  $\pm$  4.5 Ma; Jackson et al., 2004) was analyzed twice every twelve analyses, and was used as an external standard for mass bias and instrument drift correction. The Mud Tank zircon standard was analyzed once every twelve analyses as an independent control. Analyses yielded a weighted mean <sup>206</sup>Pb/<sup>238</sup>U age of 728  $\pm$  6 Ma (2 $\sigma$ ; MSWD = 0.69), which is consistent with the age determined by isotope dilution–thermal ionization mass spectrometry

( $732 \pm 5$  Ma; Black and Gulson, 1978). For the age calculation, we used the Isoplot 3.0 toolkit on Microsoft Excel (Ludwig, 2003)

### 3 Muscovite $^{40}\text{Ar}/^{39}\text{Ar}$ dating

Muscovite crystals from among samples were separated from crushed deformed rocks using conventional heavy liquid and magnetic techniques, handpicked under a binocular microscope, and then cleaned in an ultrasonic bath with Milli-Q water.

These muscovite samples packed in aluminum foil, as well as the reference biotite standard ZBH-25 ( $132.7 \pm 1.2$  Ma and K content of 7.6%; Wang, 1983), were irradiated for 21 h in a Swimming Pool Reactor at the China Institution of Atomic Energy. The mean J-values computed from standard grains within the small pits ranges from 0.00690085 to 0.007283087. The  $^{39}\text{Ar}$  and  $^{40}\text{Ar}$  contents of the samples were measured using a ARGUS VI multi-collector mass spectrometer and the  $^{40}\text{Ar}/^{39}\text{Ar}$  step-heated using a 50 W  $\text{CO}_2$  laser at the State Key Laboratory of Isotope Geochemistry, Guangzhou Institute of Geochemistry, Chinese Academy of Sciences, Guangzhou. The analytical conditions and procedure follow those described in Bai et al. (2018). All ages were calculated using  $5.531 \times 10^{-10} \text{ a}^{-1}$  as the total decay constant for  $^{40}\text{K}$  (Renne et al., 2011). The correction factors used for interfering argon isotopes derived from irradiated  $\text{CaF}_2$  and  $\text{K}_2\text{SO}_4$   $5.97 \times 10^{-4}$  for  $(^{39}\text{Ar}/^{37}\text{Ar})_{\text{Ca}}$ ,  $1.99 \times 10^{-4}$  for  $(^{36}\text{Ar}/^{37}\text{Ar})_{\text{Ca}}$ , and  $6.30 \times 10^{-4}$  for  $(^{40}\text{Ar}/^{39}\text{Ar})_{\text{K}}$ . The plateau ages comprise at least three consecutive steps of 70%  $^{39}\text{Ar}$ , and the probability of fit (P) of at least 0.05. The age uncertainty for each apparent age is given at  $2\sigma$ . The argon isotope data was calculated and plotted using the software ArArCALC (version 2.4, Koppers, 2002).

### REFERENCES CITED

- Bai, X., Qiu, H., Liu, W., and Mei, L., 2018, Automatic  $^{40}\text{Ar}/^{39}\text{Ar}$  Dating Techniques Using Multicollector Argus Vi Noble Gas Mass Spectrometer with Self-Made Peripheral Apparatus: *Journal of Earth Science*, v. 29, no. 2, p. 408–415, <https://doi.org/10.1007/s12583-017-0948-9>.
- Black, L.P., and Gulson, B.L., 1978, The age of the mud tank carbonatite, Strangways Range, Northern Territory: *BMR Journal of Australian Geology and Geophysics*, v. 3, p. 227–232.
- Jackson, S.E., Pearson, N.J., Griffin, W.L., and Belousova, E.A., 2004, The application of laser ablation-inductively coupled plasma-mass spectrometry to in situ U-Pb zircon geochronology: *Chemical Geology*, v. 211, p. 47–69, <https://doi.org/10.1016/j.chemgeo.2004.06.017>.
- Koppers, A.A., 2002, ArArCALC—software for  $^{40}\text{Ar}/^{39}\text{Ar}$  age calculations: *Computers & Geosciences*, v. 28, no. 5, p. 605–619, [https://doi.org/10.1016/S0098-3004\(01\)00095-4](https://doi.org/10.1016/S0098-3004(01)00095-4).
- Ludwig, K.R., 2003, User's manual for isoplot 3.00: a geochronological toolkit for Microsoft Excel: Berkeley Geochronology Center Special Publication, v. 4, p. 25–32.
- Prior, D.J., Boyle, A.P., Brenker, F., Cheadle, M.C., Day, A., Lopez, G., Peruzzi, L., Potts, G., Reddy, S., Spiess, R., Timms, N.E., Trimby, P., Wheeler, J., and Zetterstrom, L., 1999, The application of electron backscatter diffraction and orientation contrast imaging in the SEM to textural problems in rocks: *The American Mineralogist*, v. 84, no. 11–12, p. 1741–1759, <https://doi.org/10.2138/am-1999-11-1204>.
- Renne, P.R., Balco, G., Ludwig, K.R., Mundil, R., and Min, K., 2011, Response to the comment by W.H. Schwarz et al. on “Joint determination of  $^{40}\text{K}$  decay constants and  $^{40}\text{Ar}^*/^{40}\text{K}$  for the Fish Canyon sanidine standard, and improved accuracy for  $^{40}\text{Ar}/^{39}\text{Ar}$  geochronology” by P.

- R. Renne et al., 2010: *Geochimica et Cosmochimica Acta*, v. 75, p. 5097–5100,  
<https://doi.org/10.1016/j.gca.2011.06.021>.
- Wang, S., 1983, Age determinations of  $^{40}\text{Ar}$ - $^{40}\text{K}$ ,  $^{40}\text{Ar}$ - $^{39}\text{Ar}$  and radiogenic  $^{40}\text{Ar}$  released characteristics on K-Ar geostandards of China [in Chinese with English abstract]: *Chinese Journal of Geology*, v. 4, p. 315–323.
